# Supplementary material for: 2L-PCA: a two-level principal component analyzer for quantitative drug design and its applications
Source: PubMed Central journal article supplement (PMC5642577; doi:10.18632/oncotarget.19757), 2017-08-01
Supplement: oncotarget-08-70564-s001.pdf [file oncotarget-08-70564-s001.pdf]

## **2L-PCA: a two-level principal component analyzer for quantitative drug design and its applications**

### **SUPPLEMENTARY MATERIALS**

**Supplementary Information 1:** It consists of two types of calculation results: (1) the predicted results by 2L-PCA, and (2) the analyzed results by 2L-PCA.

See Supplementary File 1
